# Supplementary material
Source: PubMed Central journal article supplement (PMC4858343)
Supplement: oc5b00212_si_001.pdf [file oc5b00212_si_001.pdf]

## Supporting Information

### Partial Saturation of Menaquinone in *Mycobacterium tuberculosis*: Function and Essentiality of a Novel Reductase, MenJ

Ashutosh Upadhyay<sup>1</sup>, Fabio L. Fontes<sup>3</sup>, Mercedes Gonzalez-Juarrero<sup>1</sup>

Michael R. McNeil<sup>1</sup>, Debbie C. Crans<sup>2,3</sup>, Mary Jackson<sup>1</sup> and Dean C. Crick<sup>1,3\*</sup>

<sup>1</sup>Department of Microbiology, Immunology and Pathology, Colorado State University

<sup>2</sup>Department of Chemistry, Colorado State University

<sup>3</sup>Cell and Molecular Biology Program, Colorado State University

\*Corresponding Author: Mycobacteria Research Laboratories, Department of Microbiology, Immunology and Pathology, 1682 Campus Delivery, Fort Collins, CO 80523, USA. E-mail: [Dean.Crick@colostate.edu](mailto:Dean.Crick@colostate.edu); Tel. (+1) 970 491 3308; Fax (+1) 970 491 1815.

**Pages: 17**

**Figures: 5**

**Tables: 4**

## Methods.

**Construction of Deletion Mutants.** The Ts/*sacB* method<sup>(1)</sup> was used to achieve allelic replacement at the *MSMEG1132* and *Rv0561c* locus of *M. smegmatis* mc<sup>2</sup> 155 and *M. tuberculosis* H37Rv respectively. The *MSMEG1132* and *Rv0561c* genes with flanking regions were PCR amplified from their respective genomic DNA with primers Smeg1132KO F/R and Rv0561cKO F/R, subcloned in pGEMT easy vectors (Supplementary Table 2). The disrupted alleles, *MSMEG1132::kan* and *Rv0561c::kan* were obtained by inserting the *Tn903* kanamycin resistance cassette obtained from pUC4K-*kan* at the *NarI* restriction site of pBK*MSMEG1132* and *AgeI/NheI* site of pBK*Rv0561c*. Both disrupted alleles were then cloned into the *XbaI* site of pPR27-*xyIE*<sup>(2)</sup>, yielding pPR27*MSMEG1132::kan* and pPR27*Rv0561::kan*.

**Transformation of Mycobacteria Strains.** Plasmids pPR27*MSMEG1132::kan* and pPR27*Rv0561::kan* were introduced into *M. smegmatis* mc<sup>2</sup> 155 or *M. tuberculosis* H37Rv by electroporation, and transformants were selected at 30 °C on 7H10- containing 50 µg/ml kanamycin for *M. smegmatis* and 32 °C for *M. tuberculosis*. In order to select for allelic exchange, cultures were plated onto 7H10 agar plates containing 2% sucrose and kanamycin (25 µg/ml) at different dilutions and incubated at 42 °C (*M. smegmatis*) or 39 °C (*M. tuberculosis*). *XyIE*, Kan<sup>R</sup> gentamicin-sensitive and sucrose - resistant allelic exchange candidates<sup>(2)</sup> were confirmed by PCR using the primers, SmKOconf F/R and Rv0561conf F/R. PCR primers were designed from outside the genomic regions of the PCR fragment used as the allelic exchange substrate.

**Complementation of Deletion Mutants.** *M. smegmatis*  $\Delta$ *MSMEG1132* was complemented with pVV16*Rv0561c* and *M. tuberculosis* H37 $\Delta$ *Rv0561c* with pNIP40b*Rv0561c*. Plasmid pNIP40b*Rv0561c* was constructed by amplifying *Rv0561c* under control of the *phsp60* promoter

from pVV16Rv0561c using primers Rv0561NIPpvv F/R and cloned at the *Xba*I site of pNIP40b<sup>(3)</sup>.

**Aerobic growth curves.** Cultures were prepared with 7H9 medium supplemented with OADC and 0.05% (w/v) Tween-80 in triplicate for each strain. Optical density was taken at every 2 h for *M. smegmatis* stains and on alternate days for *M. tuberculosis* strains. Bacterial growth in culture was followed by measuring the OD<sub>600nm</sub> as a function of time and CFU were determined by plating culture dilutions on 7H10 agar supplemented with appropriate antibiotics.

**Hypoxic growth curves and oxygen consumption.** Bacterial growth and oxygen consumption rates were determined by growing the bacteria in sealed tubes using a modified Wayne Model<sup>(4)</sup> of hypoxic mycobacterial growth. Cultures were grown in glass tubes containing 7H9 medium with or without the addition of methylene blue (1.5 µg/ml) and a headspace ratio of 0.5. Tubes were capped, parafilm-sealed and incubated at 37° C with stirring at 100 rpm. Growth of the bacteria was monitored at OD<sub>600nm</sub> and oxygen consumption was determined by following the decolorization of methylene blue at OD<sub>670nm</sub>. Oxygen consumption was calculated as previously described<sup>(4)</sup> and rates were determined under conditions where the decrease in absorbance was linear with regard to time.

**ΔpH measurements.** Determination of ΔpH was performed using <sup>31</sup>P NMR as previously described<sup>(5, 6)</sup>. Cells were grown to a density of 10<sup>8</sup> cells/mL in 500 mL of 7H9 medium. Cells were concentrated by centrifugation and washed twice with 5 mM phosphate buffer at pH 6.8. The cell pellet was resuspended in 200 µL of the same buffer and 500 µL of the cell slurry was transferred to a 5 mm NMR tube. A capillary tube containing 85% phosphoric acid in D<sub>2</sub>O was inserted in the NMR tube to be used as standard on a Varian INOVA 300, at a frequency of 121.5 MHz. A proton-decoupled pulse angle of 60 degrees and a relaxation delay of 1 s, with a observe pulse of 68 µs, a receiver gain of 46 dB were used. Spectra were obtained within a spectral width of -50 to 50 ppm and with 1024 scans and analyzed as described elsewhere<sup>(6)</sup>

with minor modification. No oxygen or nitrogen bubbling was applied. For spectra processing data was binned every 0.02 ppm. This resulted in spectra with ~5000 data points increasing the S/N ratio. The pH was calculated using the peak corresponding to the  $\alpha$ -phosphate of ATP (-10.5 ppm) and the inorganic phosphate peaks of interest (in the region of 0-1.5 ppm), using the equation,  $\text{pH} = 6.75 + \log \frac{d-10.85}{13.25-d}$  where d is the distance between the  $\alpha$ -phosphate of ATP and the inorganic phosphate peak, in ppm<sup>(6)</sup>. The antibiotics valinomycin and nigericin were used as control compounds that dissipate  $\Delta\Psi$  and  $\Delta\text{pH}$ , respectively, in many bacteria including mycobacteria<sup>(7)</sup>.

**Fluorometric measurement of membrane potential dissipation ( $\Delta\Psi$ ).** The membrane potential dissipation was measured fluorimetrically using the  $\Delta\Psi$ -sensitive fluorescent dye DiSC3(5) as previously described<sup>(5, 8, 9)</sup> with minor modifications. Assays were performed in black walled 96 well plates with a reaction volume of 200  $\mu\text{l}$  using a BioTek<sup>®</sup> Synergy HT Multi-Mode Micro Plate Reader with excitation at 600 nm, emission at 645 nm and a slit width of 40 nm for detection. Dissipation of  $\Delta\Psi$  at the indicated concentrations of valinomycin was measured and the effective concentrations for 50% dissipation of  $\Delta\Psi$  ( $\text{EC}_{50}$ ) were calculated<sup>(5)</sup>.

**Table S1.** Structures and calculated monoisotopic masses for menaquinones described in this study.

| Menaquinone               | Calculated monoisotopic mass | Structure                                                                            |
|---------------------------|------------------------------|--------------------------------------------------------------------------------------|
| MK-4                      | 444.3028                     | 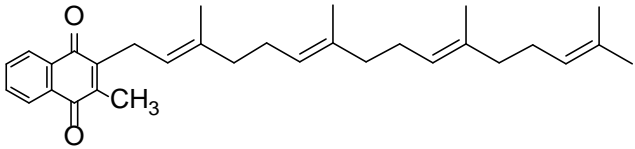   |
| MK-8                      | 716.5532                     |    |
| *MK-8(II-H <sub>2</sub> ) | 718.5689                     |    |
| MK-9                      | 784.6158                     |   |
| *MK-9(II-H <sub>2</sub> ) | 786.6315                     |  |

\*position of saturated double bond is drawn to be consistent with previous reports for *Mycobacterium phlei* and various other Gram-positive organisms<sup>(10-13)</sup>.

**Table S2.** Bacterial strains and plasmids used in this study.

| Strains/ plasmids                           | Relevant characteristics/ Description                                                                                                                                             | References        |
|---------------------------------------------|-----------------------------------------------------------------------------------------------------------------------------------------------------------------------------------|-------------------|
| <i>Escherichia coli</i> DH5 $\alpha$        | F- $\Phi$ 80 <i>lacZ</i> $\Delta$ M15 $\Delta$ ( <i>lacZ</i> Y <i>A-argF</i> ) U169 <i>recA1 endA1 hsdR17</i> (rK-, mK+) <i>phoA supE44</i> $\lambda$ - <i>thi-1 gyrA96 relA1</i> | Invitrogen        |
| <i>Escherichia coli</i> BL21 (DE3) pLysS    | F- <i>ompT hsdSB</i> (rB-, mB-) <i>gal dcm</i> (DE3) pLysS (Cam <sup>R</sup> )                                                                                                    | Invitrogen        |
| <i>M. smegmatis</i> mc <sup>2</sup> 155     | Parent strain                                                                                                                                                                     | (14)              |
| <i>M. smegmatis</i> $\Delta$ MSMEG1132      | <i>M. smegmatis</i> mc <sup>2</sup> 155 knock out strain with deletion and insertion of <i>kan</i> <sup>r</sup> gene in MSMEG1132                                                 | This study        |
| <i>M. tuberculosis</i> H37Rv                | Parent strain H37Rv TMC 102                                                                                                                                                       | ATCC 27094        |
| <i>M. tuberculosis</i> H37 $\Delta$ Rv0561c | <i>M. tuberculosis</i> H37Rv knock strain with deletion and insertion of <i>kan</i> <sup>r</sup> gene in <i>Rv0561c</i>                                                           | This study        |
| pGEM <sup>®</sup> -T Easy                   | 2.9 kb <i>E. coli</i> cloning vector, <i>lacZ</i> , <i>amp</i> , f1 origin                                                                                                        | Promega           |
| pBluescript SK+                             | Cloning vector; ColE1 replicon; <i>amp</i> (2.9 kb)                                                                                                                               | Stratagene        |
| pPR27- <i>xyIE</i>                          | Derivative of pPR27 carrying the <i>xyIE</i> gene. <i>E. coli</i> - Mycobacterial shuttle vector, <i>ts oriM</i> , <i>sacB</i> , <i>gm</i> <sup>f</sup> , <i>xyIE</i> (~10.7kb)   | (1)               |
| pUC4K- <i>kan</i>                           | 3.9 kb <i>E. coli</i> vector, source of <i>kan</i> <sup>r</sup> gene                                                                                                              | Pharmacia Biotech |
| pVV16                                       | Kan <sup>r</sup> ; Hyg <sup>r</sup> ; expression vector used for constitutive protein expression from a <i>phsp60</i> promoter (~5.9 kb)                                          | (15)              |
| pNIP40b                                     | Hyg <sup>r</sup> ; Integrative vector                                                                                                                                             | (3, 16)           |
| pGEKOMSMEG1132                              | 621 bp upstream and 751 bp downstream region of MSMEG1132 gene from <i>M. smegmatis</i> mc <sup>2</sup> 155 cloned in pGEM <sup>®</sup> -T Easy vector (~5.5 kb)                  | This study        |
| pBKOMSMEG1132                               | MSMEG1132 gene obtained from pGEKOMSMEG1132, cloned at <i>Xba</i> I in pBluescript SK+ vector (~5.5 kb)                                                                           | This study        |
| pBKKOMSMEG1132:: <i>kan</i>                 | pBKOMSMEG1132 containing <i>kan</i> <sup>r</sup> gene at <i>Nar</i> I site (~6.7 kb)                                                                                              | This study        |

|                               |                                                                                                                                                                       |            |
|-------------------------------|-----------------------------------------------------------------------------------------------------------------------------------------------------------------------|------------|
| pPR27KOMSMEG1132:: <i>kan</i> | <i>MSMEG1132::kan</i> obtained from pBKOMSMEG1132:: <i>kan</i> cloned into pPR27- <i>xyIE</i> at <i>Xba</i> I site (~14.5 kb).                                        | This study |
| pGEMKORv0561c                 | 830 bp upstream and 858 bp downstream region of <i>Rv0561c</i> gene from <i>M. tuberculosis</i> H37Rv cloned in pGEM®-T Easy vector (~5.8 kb)                         | This study |
| pBKKORv0561c                  | <i>Rv0561c</i> gene obtained from pGEMKORv0561c, cloned at <i>Xba</i> I in pBluescript SK+ vector (~5.8 kb)                                                           | This study |
| pBKKORv0561c:: <i>kan</i>     | pBKORv0561c containing <i>kan<sup>r</sup></i> gene at <i>Age</i> I/ <i>Nhe</i> I site (~7.0 kb)                                                                       | This study |
| pPR27KORv0561c:: <i>kan</i>   | <i>Rv0561c::kan</i> obtained from pBKORv0561c:: <i>kan</i> cloned into pPR27- <i>xyIE</i> at <i>Xba</i> I site (~17.7 kb)                                             | This study |
| pVV16Rv0561c                  | <i>Rv0561c</i> gene cloned in pVV16 vector (~7.1 kb)                                                                                                                  | This study |
| pNIP40bRv0561c                | Construct containing promoter regions of pVV16 with <i>Rv0561c</i> gene from pVV16Rv0561c, cloned into pNIP40b at <i>Xba</i> I site (~1.5 kb), <i>hyg<sup>r</sup></i> | This study |

---

**Table S3.** PCR primers used in this study.

| <b>Primers</b>    | <b>Sequence (5'-3')</b>                   | <b>Restriction site</b> |
|-------------------|-------------------------------------------|-------------------------|
| Smeg1132 F        | ATT <u>CATATGA</u> ACACCCGAGCGGATGTGGTC   | <i>NdeI</i>             |
| Smeg1132 R        | TATA <u>AAGCTTT</u> CAGCTGAACGGCACCCGCTG  | <i>HindIII</i>          |
| Rv0561c F         | ATT <u>CATATG</u> AGCGTGGATGACAGTGCCGAC   | <i>NdeI</i>             |
| Rv0561c R         | TATA <u>AAGCTTT</u> CAGCTGAACGGCGGTCTGTCG | <i>HindIII</i>          |
| Smeg1132KO F      | ATAT <u>CTAGAG</u> GAGAACGTTCGCACCGAACCG  | <i>XbaI</i>             |
| Smeg1132KO R      | ATAT <u>CTAGA</u> AAGGATCAGCCCGGTGGAGGGC  | <i>XbaI</i>             |
| Rv0561cKO F       | ATAT <u>CTAGAC</u> CGTTCAGCAGTGCGCGCA     | <i>XbaI</i>             |
| Rv0561cKO R       | ATAT <u>CTAGAT</u> TGCGCCGGCGCTGCCAAAC    | <i>XbaI</i>             |
| Rv0561conf F      | CCGTCCC GGGACGTCTGGGCAG                   | -                       |
| Rv0561conf R      | AAGCCAAGCGTTGTAGTCCTG                     | -                       |
| SmKOconf F        | GGCGTCTTGCCGGACTCGTC                      | -                       |
| SmKOconf R        | CTACGTGGGGACCGTGGGTGC                     | -                       |
| Rv0561NIPpvv F    | ATAT <u>CTAGAC</u> GAATCGCTCATCACCTCGTC   | <i>XbaI</i>             |
| Rv0561NIPpvv R    | ATAT <u>CTAGA</u> AAGTCATGTGTTTCATATATATC | <i>XbaI</i>             |
| Rv0561confNIP F   | GTGCGTGCTGGTGTCTGCGCGCA                   | -                       |
| Rv0561confNIP R   | CGGCCGGCAACCAAGGGTGCG                     | -                       |
| Rv0561complconf F | ATGCTACTTGGCGCTAAAGCC                     | -                       |
| Rv0561complconf R | AACCGAGAAGCCGCGACCGTA                     | -                       |



**Table S4.** Comparison of  $\Delta\text{pH}$  in WT *M. smegmatis* mc<sup>2</sup> 155 and *M. smegmatis* $\Delta\text{MSMEG1132}$  treated with various ionophores.

| Strains                                      | Drugs ( $\mu\text{M}$ )         | $\text{pH}_{\text{out}}$ | $\text{pH}_{\text{in}}$ | $\Delta\text{pH}$ |
|----------------------------------------------|---------------------------------|--------------------------|-------------------------|-------------------|
| <i>M. smegmatis</i> mc <sup>2</sup> 155      | No drug                         | 6.82                     | 7.08                    | 0.26              |
|                                              | Valinomycin (33 $\mu\text{M}$ ) | 6.83                     | 7.07                    | 0.24              |
|                                              | Nigericin (5 $\mu\text{M}$ )    | 6.82                     | 6.82                    | -                 |
| <i>M. smegmatis</i> $\Delta\text{MSMEG1132}$ | No drug                         | 6.80                     | 7.06                    | 0.26              |
|                                              | Valinomycin (33 $\mu\text{M}$ ) | 6.84                     | 7.08                    | 0.26              |
|                                              | Nigericin (5 $\mu\text{M}$ )    | 6.83                     | 6.83                    | -                 |

**Figure S1. Sequence alignment of MenJ with similar proteins from representative mycobacteria spp.**

Amino acid sequence alignment of *Rv0561c* and *MSMEG1132* with similar proteins from representative *Mycobacterium* species. Alignment was done on the MultAlin website<sup>(17)</sup>. White letters on red = high consensus, red letters on white = low consensus, black letters = neutral. Figure prepared using ESPrnt 3.0<sup>(17)</sup>.

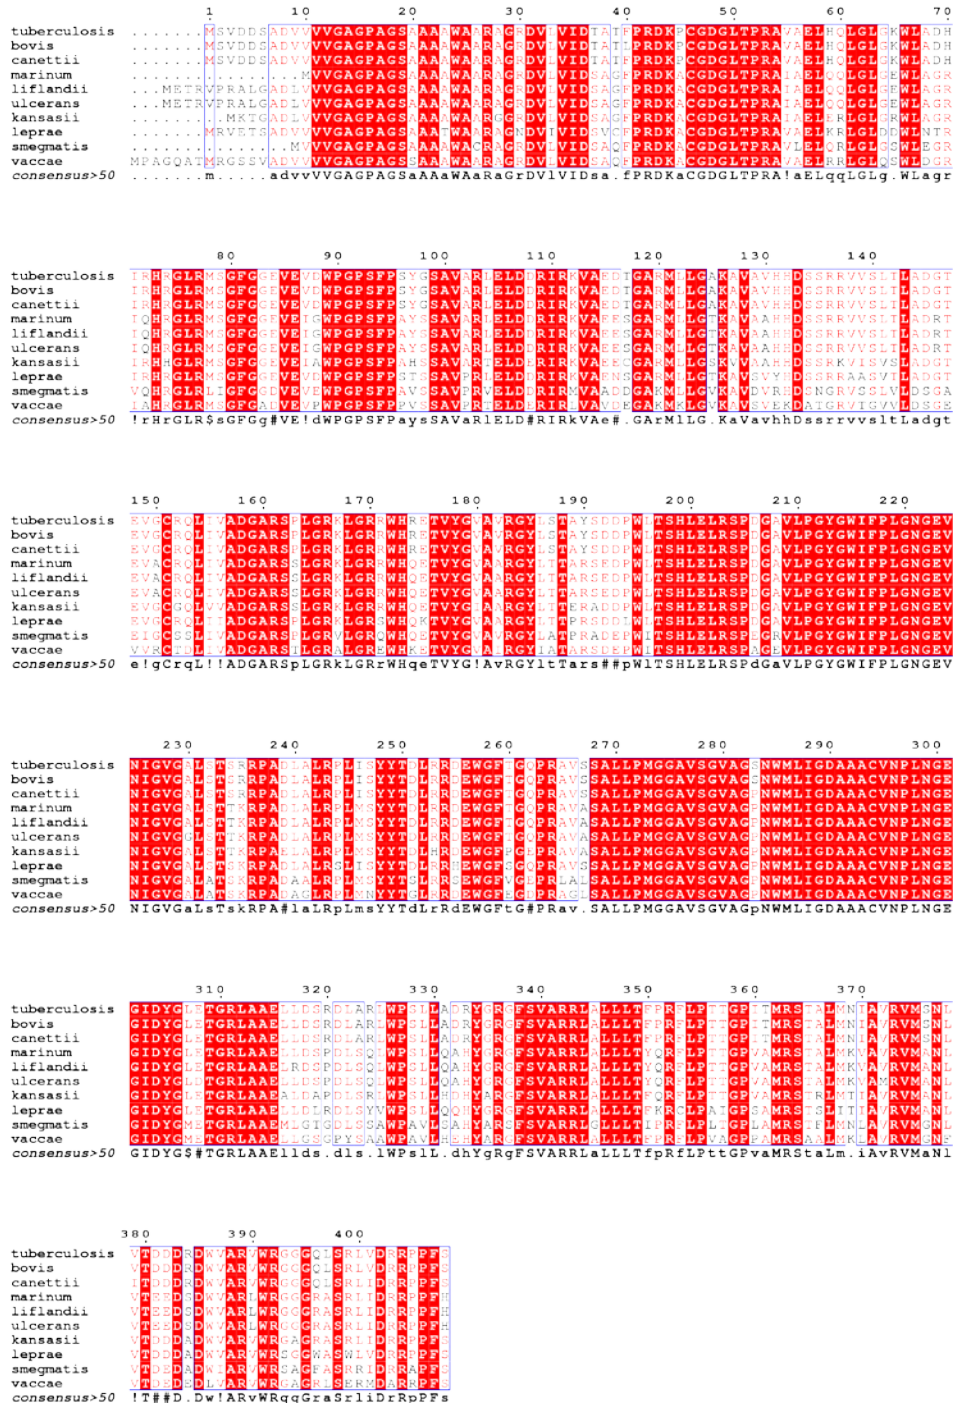

**Figure S2. Tandem MS analysis of menaquinone from recombinant *E. coli* expressing MSMEG1132.**

LCQ ion-trap tandem MS analysis of MK-8 from WT *E. coli* (Panel A) and MK-8(II-H<sub>2</sub>) from recombinant *E. coli* expressing MSMEG1132 (Panel B). The insets show the inferred fragmentation which probably occurs with internal hydrogen migration to form a conjugated double bond system.

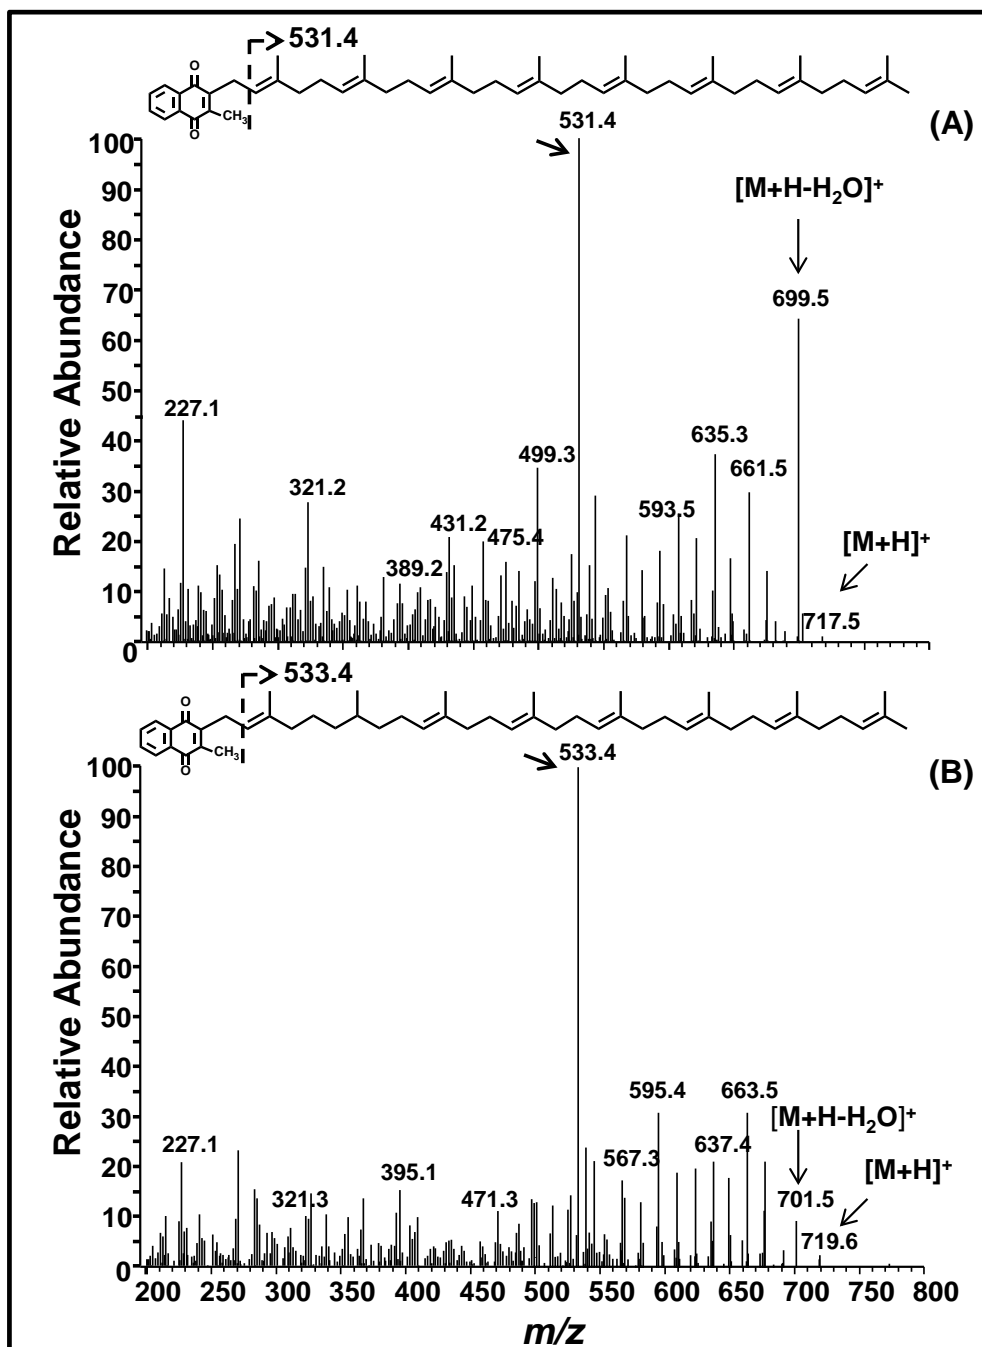

**Figure S3. Tandem MS of MK-9(II-H<sub>2</sub>).**

LCQ ion-trap tandem MS analysis of MK-9(II-H<sub>2</sub>) extracted from WT *M. smegmatis* showing the structure with inferred fragmentation pattern, a typical chromatogram and table showing observed *m/z* values for the indicated ions.

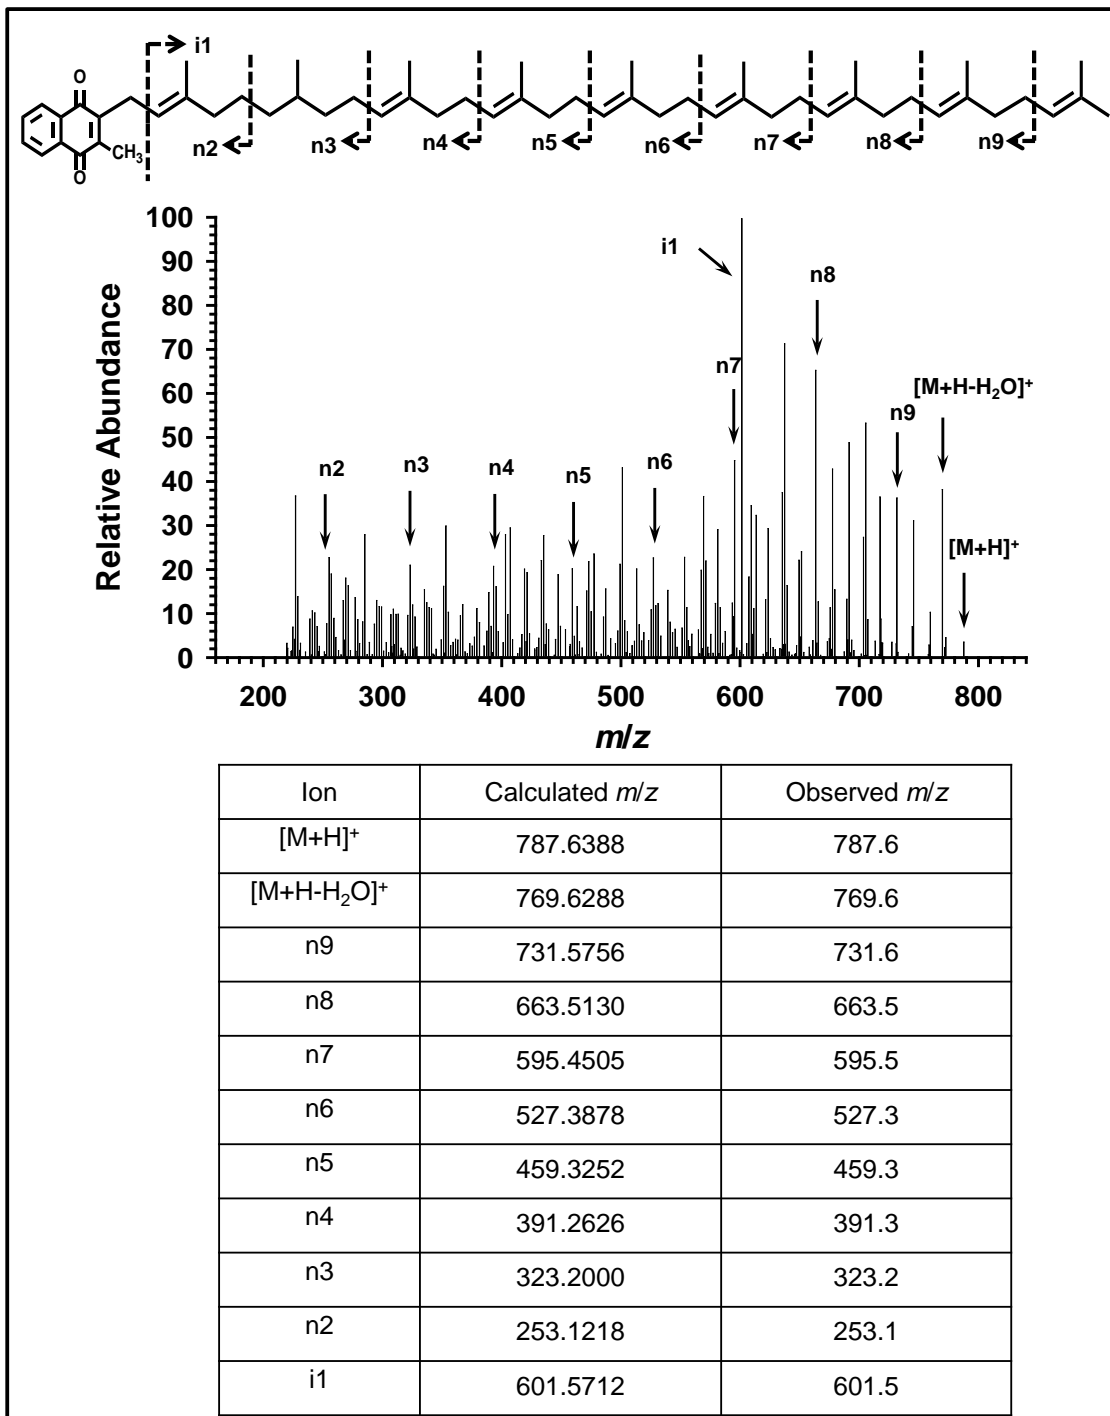

**Figure S4. PCR confirmation of different strains generated in the study.**

PCR amplification using the SmKNconf F/R and Rv0561conf F/R primers (Table S3) confirmed the knock outs for *M. smegmatis*  $\Delta$ MSMEG1132 (gel A) and *M. tuberculosis* H37 $\Delta$ Rv0561c (gel B) strains, respectively. Amplicons from the KO strains contain an insertion of a 1.2 kb kan<sup>r</sup> gene. Confirmation of Rv0561c complementation in *M. tuberculosis* H37 $\Delta$ Rv0561c (gel C) was done using primers Rv0561confNIP F/R designed from the deleted regions of Rv0561c from *M. tuberculosis* H37 $\Delta$ Rv0561c. *M. tuberculosis* H37 $\Delta$ Rv0561c, containing the kan<sup>r</sup> gene, did not amplify but when complemented with Rv0561c generated an amplicon similar to WT. The lane labelled L contains DNA size markers.

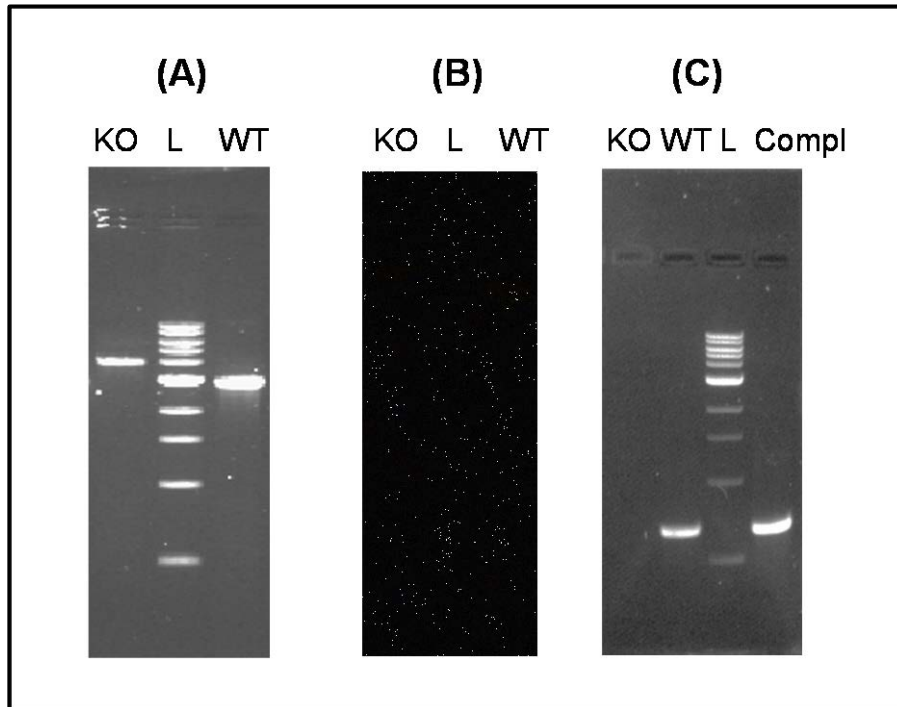

**Figure S5. Fluorometric measurement of membrane potential ( $\Delta\Psi$ ) dissipation.**

Fluorimetric measurement of membrane potential dissipation ( $\Delta\Psi$ ) by the indicated concentrations of valinomycin in WT *M. smegmatis* (Panel A) and *M. smegmatis*  $\Delta$ MSMEG1132 (Panel B) using DiSC3(5). Arrows indicate addition of valinomycin.  $EC_{50}$  values for valinomycin dissipation of  $\Delta\Psi$  in WT (Panel C) and  $\Delta$ MSMEG1132 *M. smegmatis* (Panel D) were calculated as % of maximally observed dissipation using the data shown in Panels A and B.  $EC_{50}$  values,  $\pm$  standard error, were calculated using GraFit 5.0.13 (Erithacus Software Ltd.).

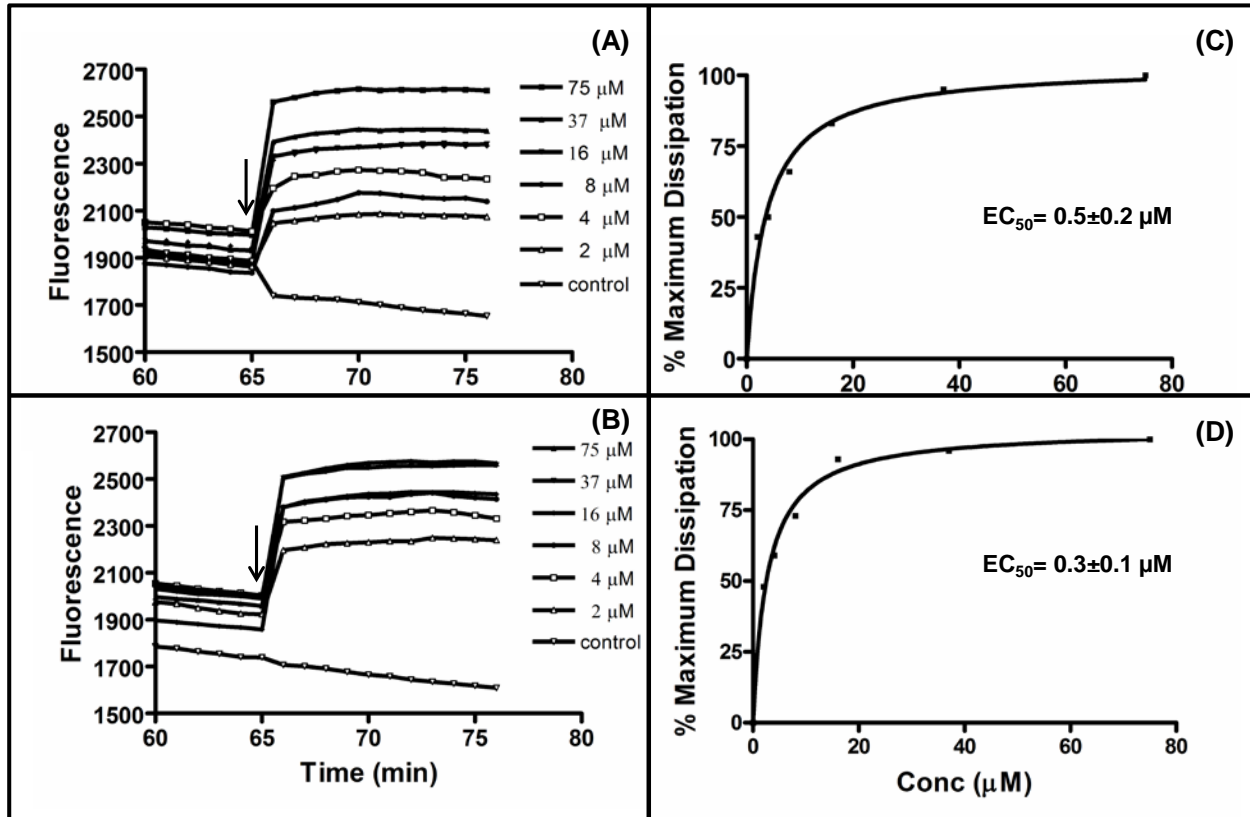

## References

1. Pelicic, V., Jackson, M., Reyrat, J. M., Jacobs, W. R., Jr., Gicquel, B., and Guilhot, C. (1997) Efficient allelic exchange and transposon mutagenesis in *Mycobacterium tuberculosis*, *Proc. Natl. Acad. Sci. U. S. A.* *94*, 10955-10960.
2. Curcic, R., Dhandayuthapani, S., and Deretic, V. (1994) Gene expression in mycobacteria: transcriptional fusions based on *xylE* and analysis of the promoter region of the response regulator *mtrA* from *Mycobacterium tuberculosis*, *Mol. Microbiol.* *13*, 1057-1064.
3. Berthet, F. X., Lagranderie, M., Gounon, P., Laurent-Winter, C., Ensergueix, D., Chavarot, P., Thouron, F., Maranghi, E., Pelicic, V., Portnoi, D., Marchal, G., and Gicquel, B. (1998) Attenuation of virulence by disruption of the *Mycobacterium tuberculosis erp* gene, *Science* *282*, 759-762.
4. Abomoelak, B., Hoyer, E. A., Chi, J., Marcus, S. A., Laval, F., Bannantine, J. P., Ward, S. K., Daffe, M., Di Liu, H., and Talaat, A. M. (2009) *mosR*, A novel transcriptional regulator of hypoxia and virulence in *Mycobacterium tuberculosis*, *J. Bacteriol.* *191*, 5941-5952.
5. Li, K., Schurig-Briccio, L. A., Feng, X., Upadhyay, A., Pujari, V., Lechartier, B., Fontes, F. L., Yang, H., Rao, G., Zhu, W., Gulati, A., No, J. H., Cintra, G., Bogue, S., Liu, Y. L., Molohon, K., Orlean, P., Mitchell, D. A., Freitas-Junior, L., Ren, F., Sun, H., Jiang, T., Li, Y., Guo, R. T., Cole, S. T., Gennis, R. B., Crick, D. C., and Oldfield, E. (2014) Multitarget drug discovery for tuberculosis and other infectious diseases, *J. Med. Chem.* *57*, 3126-3139.
6. Navon, G., Ogawa, S., Shulman, R. G., and Yamane, T. (1977) High-resolution <sup>31</sup>P nuclear magnetic resonance studies of metabolism in aerobic *Escherichia coli* cells, *Proc. Natl. Acad. Sci. U. S. A.* *74*, 888-891.

7. Rao, S. P., Alonso, S., Rand, L., Dick, T., and Pethe, K. (2008) The protonmotive force is required for maintaining ATP homeostasis and viability of hypoxic, nonreplicating *Mycobacterium tuberculosis*, *Proc. Natl. Acad. Sci. U. S. A.* 105, 11945-11950.
8. Breeuwer, P., and Abee, T. (2004) Assessment of the membrane potential, intracellular pH and respiration of bacteria employing fluorescence techniques, In *Molecular Microbial Ecology Manual* (Kowalchuk, G. A., de Bruijn, F. J., Head, I. M., Akkermans, A. D., and van Elsas, J. D., Eds.) 2nd Edition ed., Springer Netherlands, Published Electronically.
9. Li, W., Upadhyay, A., Fontes, F. L., North, E. J., Wang, Y. H., Crans, D. C., Grzegorzewicz, A. E., Jones, V., Franzblau, S. G., Lee, R. E., Crick, D. C., and Jackson, M. (2014) Novel Insights into the Mechanism of Inhibition of MmpL3, a Target of Multiple Pharmacophores in *Mycobacterium tuberculosis*, *Antimicrob. Agents Chemother.* 58, 6413-6423.
10. Azerad, R., and Cyrot-Pelletier, M. O. (1973) Structure and configuration of the polyprenoid side chain of dihydromenaquinones from Myco- and Corynebacteria, *Biochimie* 55, 591-603.
11. Phillips, P. G., Dunphy, P. J., Servis, K. L., and Brodie, A. F. (1969) A new menaquinone series differing in the degree of unsaturation of the side chain, *Biochemistry (Mosc.)* 8, 2856-2861.
12. Dunphy, P. J., Gutnick, D. L., Phillips, P. G., and Brodie, A. F. (1968) A new natural naphthoquinone in *Mycobacterium phlei*. Cis-dihydromenaquinone-9, structure and function, *J. Biol. Chem.* 243, 398-407.
13. Azerad, R., Cyrot, M. O., and Lederer, E. (1967) Structure of the dihydromenaquinone-9 of *Mycobacterium phlei*, *Biochem. Biophys. Res. Commun.* 27, 249-252.



14. Snapper, S. B., Melton, R. E., Mustafa, S., Kieser, T., and Jacobs, W. R., Jr. (1990) Isolation and characterization of efficient plasmid transformation mutants of *Mycobacterium smegmatis*, *Mol. Microbiol.* 4, 1911-1919.
15. Kordulakova, J., Gilleron, M., Mikusova, K., Puzo, G., Brennan, P. J., Gicquel, B., and Jackson, M. (2002) Definition of the first mannosylation step in phosphatidylinositol mannoside synthesis. PimA is essential for growth of mycobacteria, *J. Biol. Chem.* 277, 31335-31344.
16. Mederle, I., Bourguin, I., Ensergueix, D., Badell, E., Moniz-Peixeira, J., Gicquel, B., and Winter, N. (2002) Plasmidic versus insertional cloning of heterologous genes in *Mycobacterium bovis* BCG: impact on *in vivo* antigen persistence and immune responses, *Infect. Immun.* 70, 303-314.
17. Corpet, F. (1988) Multiple sequence alignment with hierarchical clustering, *Nucleic Acids Res.* 16, 10881-10890.
